# Supplementary material for: Estrogen receptor α drives pro-resilient transcription in mouse models of depression
Source: PubMed Central journal article supplement (PMC5856766; doi:10.1038/s41467-018-03567-4), 2018-03-16
Supplement: 41467_2018_3567_MOESM1_ESM.pdf [file 41467_2018_3567_MOESM1_ESM.pdf]

Supplemental Figure 1

Lorsch *et al.*

a

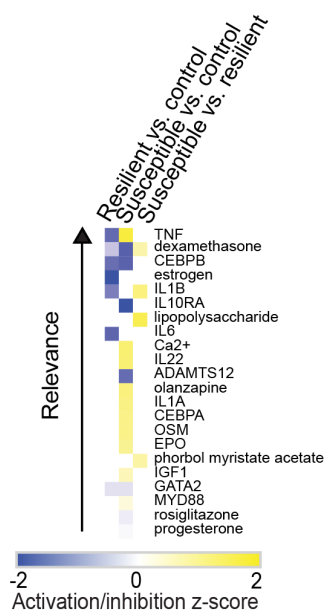

b

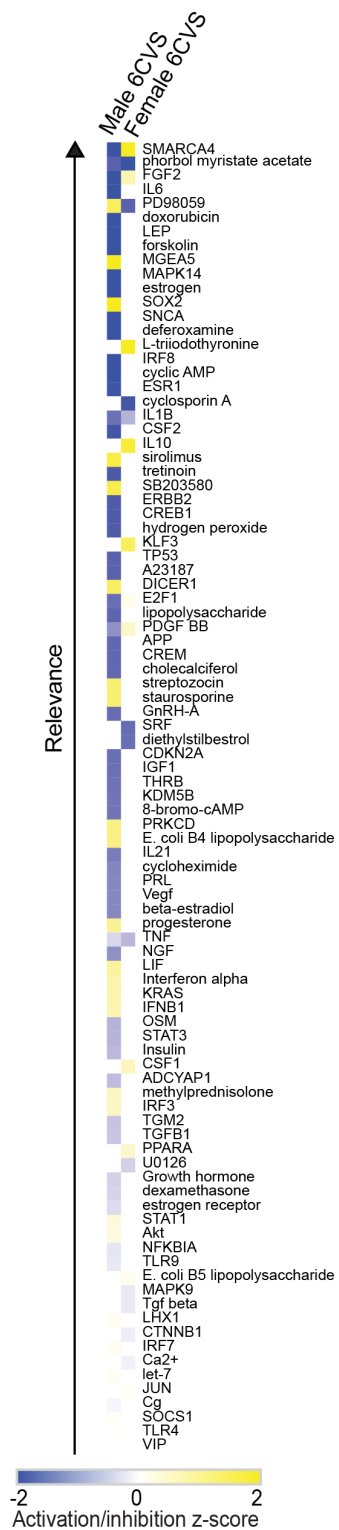

**Supplementary Figure 1: Predicted upstream regulators of transcriptional changes following CSDS in PFC and CVS in NAc.** (a) Findings from IPA upstream regulator analysis of differentially expressed genes (log fold change > 1;  $P < 0.05$ ) in PFC following CSDS reveals that *ESRI* is not a predicted upstream regulator of differentially expressed genes in this brain region. (b) IPA upstream regulator analysis of differentially expressed (log fold change > 1;  $P < 0.05$ ) genes in NAc following 6 day of CVS. *ESRI* is predicted to be significantly inhibited (z-score = -1.80;  $P < 1.76 \times 10^{-3}$ ) following CVS in males with no predicted regulation for female CVS.

Supplemental Figure 2

Lorsch *et al.*

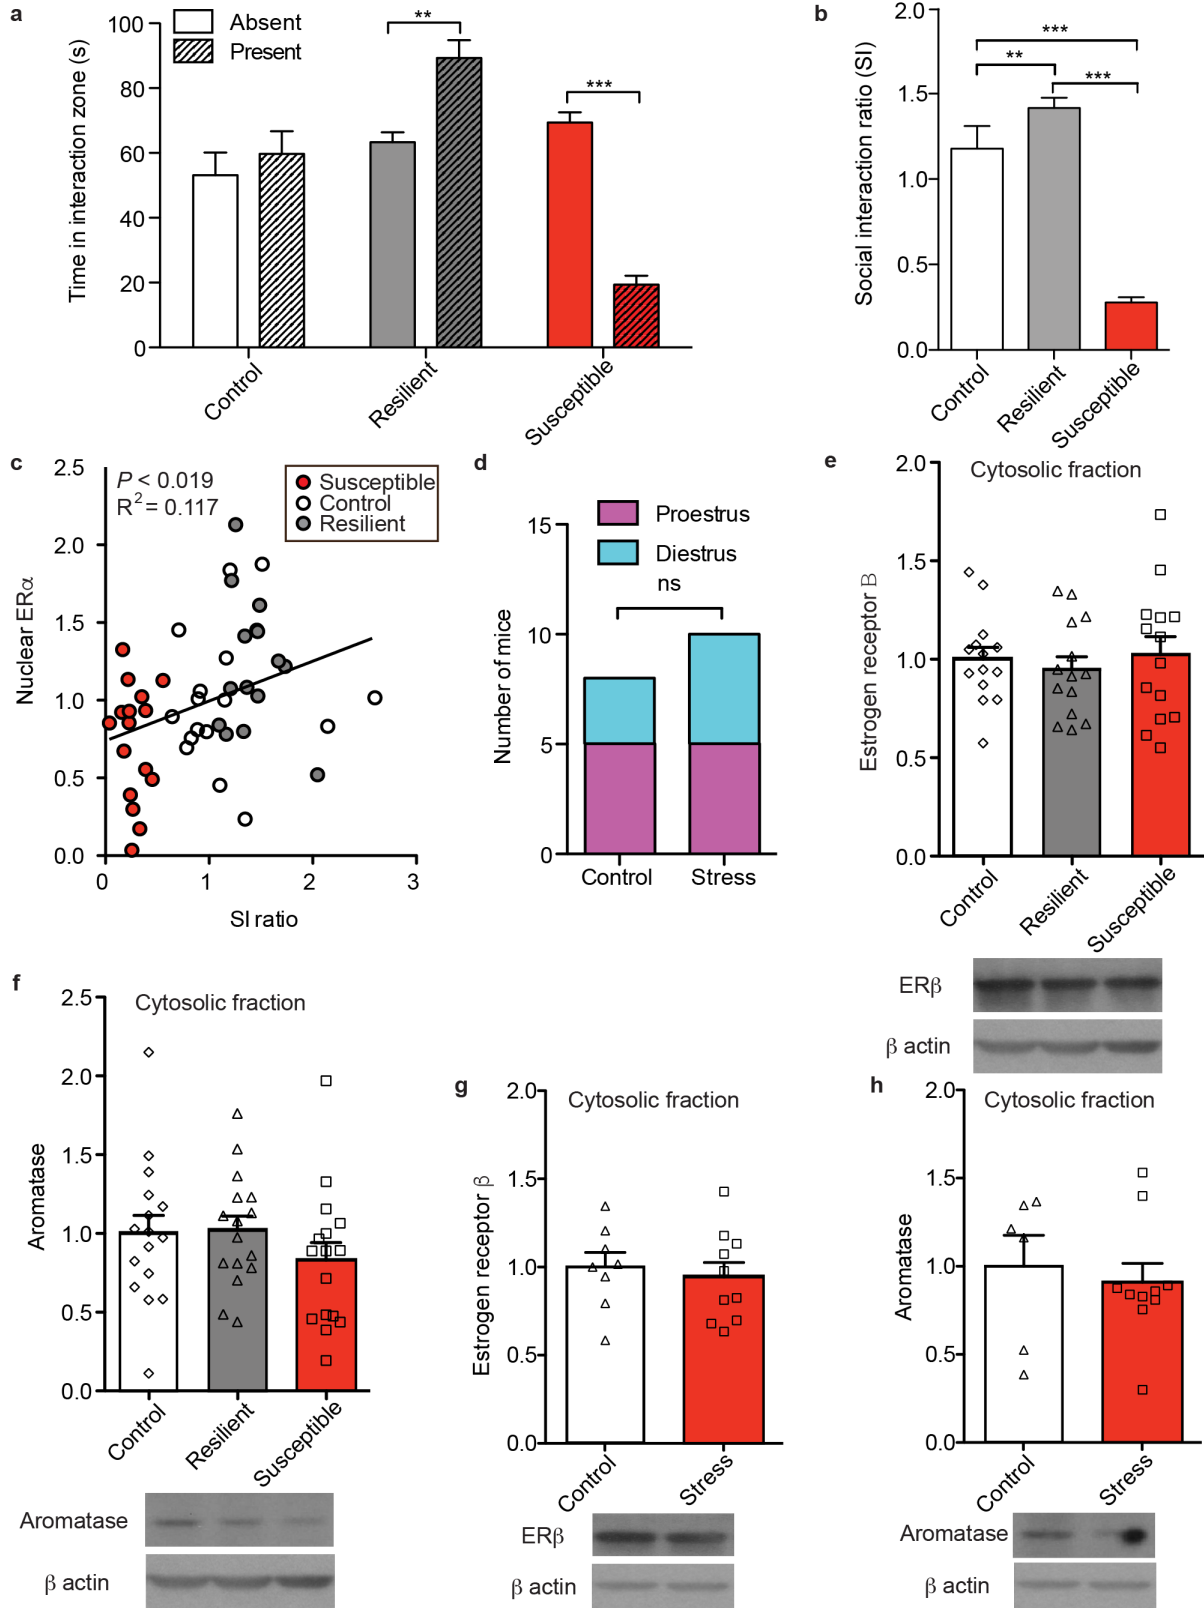

**Supplementary Figure 2: Characterization of stress phenotypes and their effect on**

**estrogen-related protein expression in NAc.** In male mice used for protein analysis **(a)** there are significant group differences in time spent in the interaction zone in the social interaction test ( $\chi^2(5) = 44.96, P < 0.001, n = 16$ ). Control, susceptible, and resilient mice show different preferences for the interaction zone when the CD1 aggressor is present ( $\chi^2(2) = 28.53, P < 0.001$ ), but not when the CD1 aggressor is absent ( $\chi^2(2) = 3.41, P < 0.182$ ). Resilient mice spend more time in the interaction zone when the CD1 mouse is present ( $P < 0.002$ ) while susceptible mice spend more time in the interaction zone when the CD1 mouse is absent ( $P < 0.001$ ). **(b)** There is an effect ( $\chi^2(2) = 34.47, P < 0.001, n = 16$ ) of CSDS phenotype on SI with susceptible mice showing lower SI ratios than both resilient ( $P < 0.001$ ) and control ( $P < 0.001$ ) phenotypes, and resilient mice showing higher SI than controls ( $P < 0.008$ ). **(c)** Across all phenotypes, larger SI is positively associated with higher nuclear ER $\alpha$  protein levels in NAc as determined by linear regression analysis ( $F_{(1,45)} = 5.94, P < 0.019; R^2=0.117, n=47$ ). **(d)** Estrus cycle analysis reveals similar distributions of proestrus and diestrus mice in CVS females utilized for protein analysis ( $X^2(1, N=18) = 0.281, P < 0.596$ ). CSDS phenotype has no effect on the expression of **(e)** ER $\beta$  ( $F_{(2,39)} = 0.279, P < 0.758; n = 14$ ) or **(f)** aromatase ( $F_{(2,45)} = 0.961, P < 0.390; n = 16$ ) expression in the cytosolic fraction of male mice. CVS has no effect on the expression of **(g)** ER $\beta$  ( $t_{(16)} = 0.48, P < 0.641; n = 8,10$ ) or **(h)** aromatase ( $t_{(14)} = 0.47, P < 0.647; n = 6,10$ ) in the cytosolic fraction of female mice. Error bars  $\pm$  SEM. **a, b** Kruskal-Wallis test. **d** Chi-Square test. **e, f** One-way ANOVA. **g, h** two tailed t-test. \*\* $P < 0.01$ , \*\*\* $P < 0.001$ , post-hoc independent samples Mann-Whitney. ns = not significant.

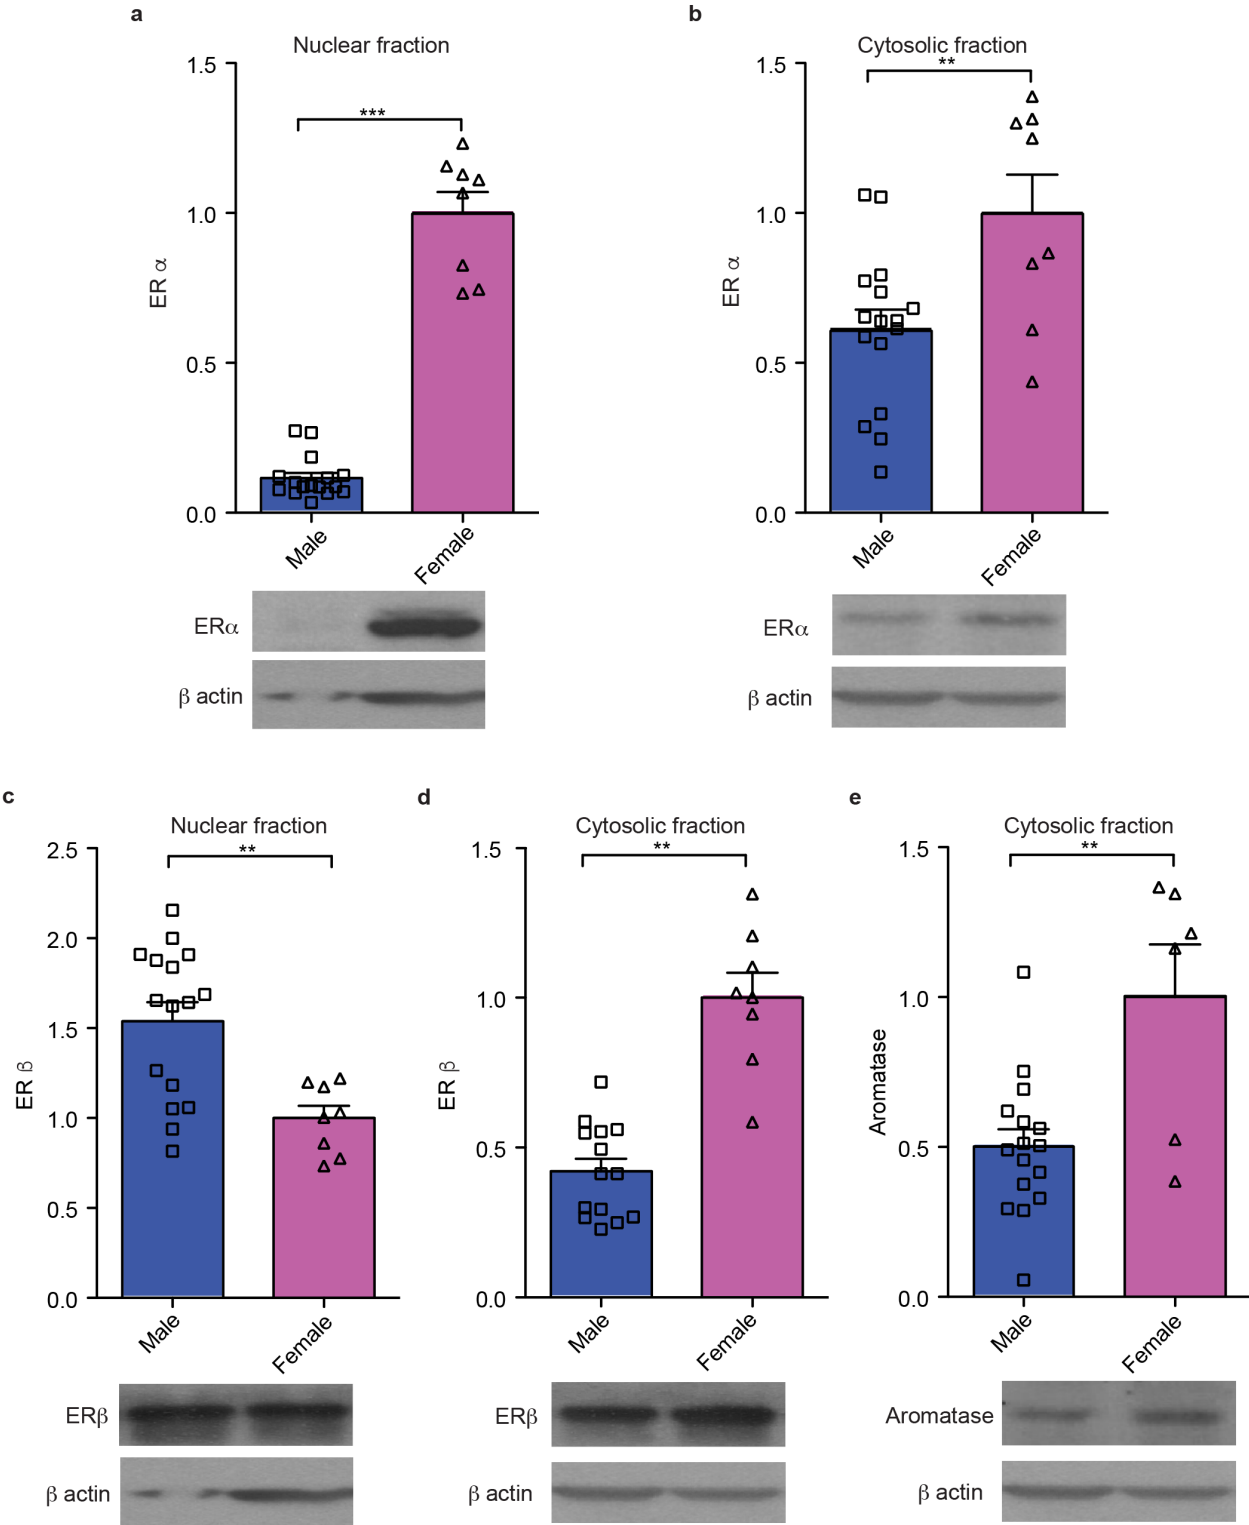

**Supplementary Figure 3: Baseline sex differences in the expression of estrogen receptors and aromatase in the mouse NAc.** Male mice exhibit lower levels ER $\alpha$  (**a**) in the nucleus ( $U = 0$ ,  $P < 0.001$ ,  $n = 16,8$ ) and (**b**) cytosol ( $t_{(22)} = 3.012$ ,  $P < 0.006$ ;  $n = 16,8$ ) when compared to female mice at baseline. (**c**) Male mice show more ER $\beta$  in the nucleus than female mice ( $U = 19$ ,  $P < 0.006$ ,  $n = 16,8$ ). In control mice in the cytosolic fraction, both (**d**) ER $\beta$  ( $t_{(20)} = 6.93$ ,  $P < 0.001$ ;  $n = 14,8$ ) and (**e**) aromatase ( $t_{(20)} = 3.54$ ,  $P < 0.002$ ;  $n = 16,6$ ) are expressed at higher levels in female than male mice. **a, c** independent samples Mann-Whitney. **b, d, e** two tailed t-test.  $^{**}P < 0.01$ ,  $^{***}P < 0.001$ .

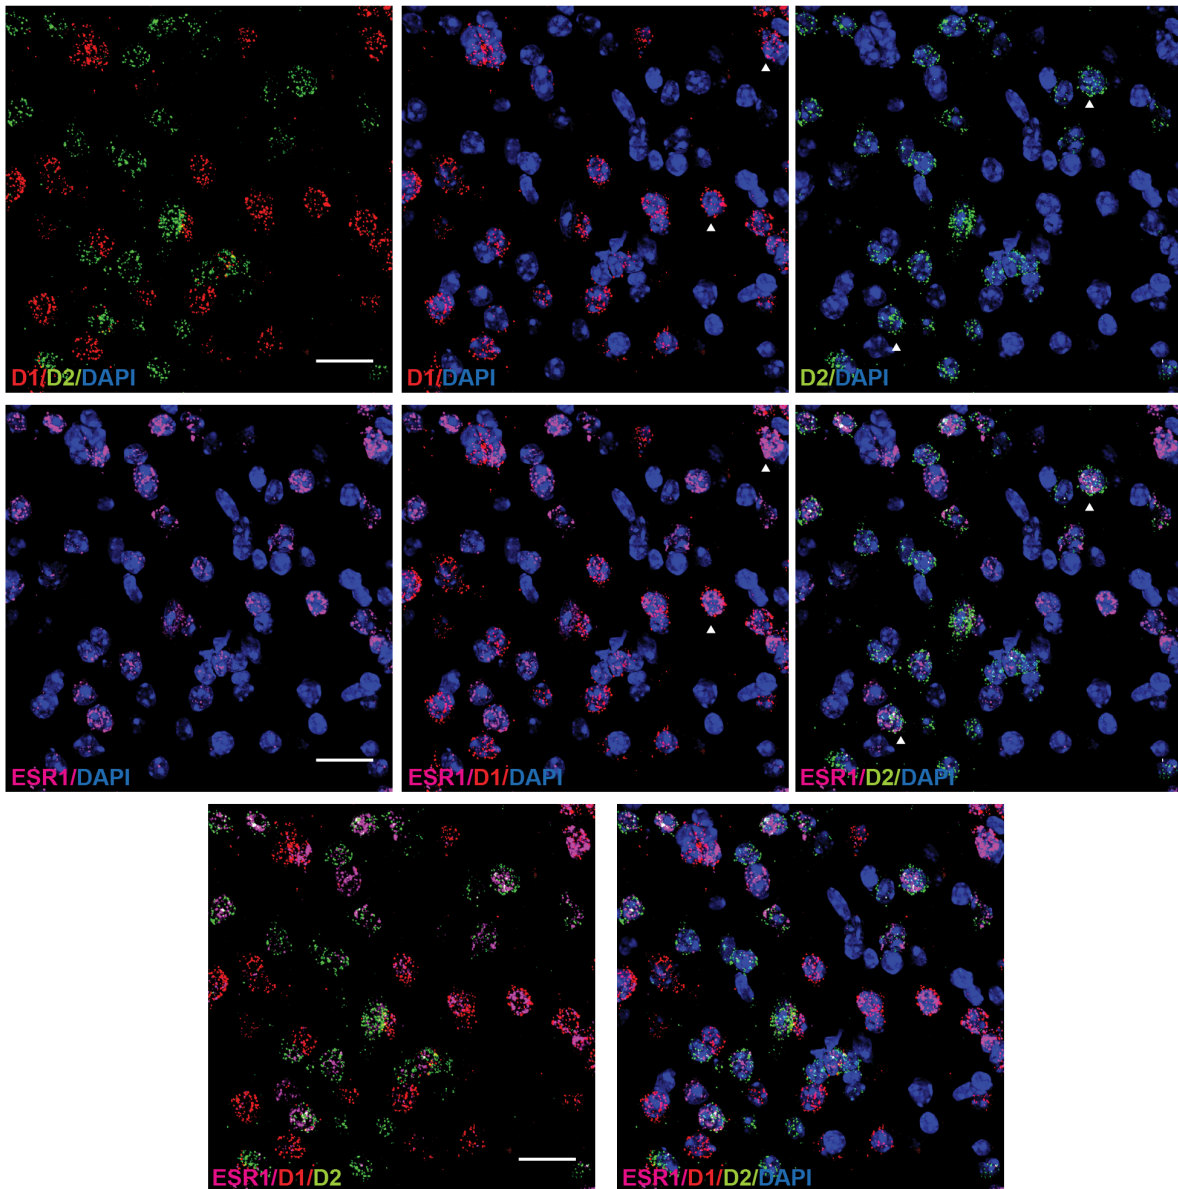

**Supplementary Figure 4: Localization of virus-dependent *ESRI* mRNA within D1 and D2 expressing neurons in NAc.** RNAscope probes for human *ESRI* (magenta), which were expressed as a result of the AAV-*ESRI* injection, overlap with probes for both D1 (red) and D2 (green) positive neurons. Scale bars = 20  $\mu$ M.

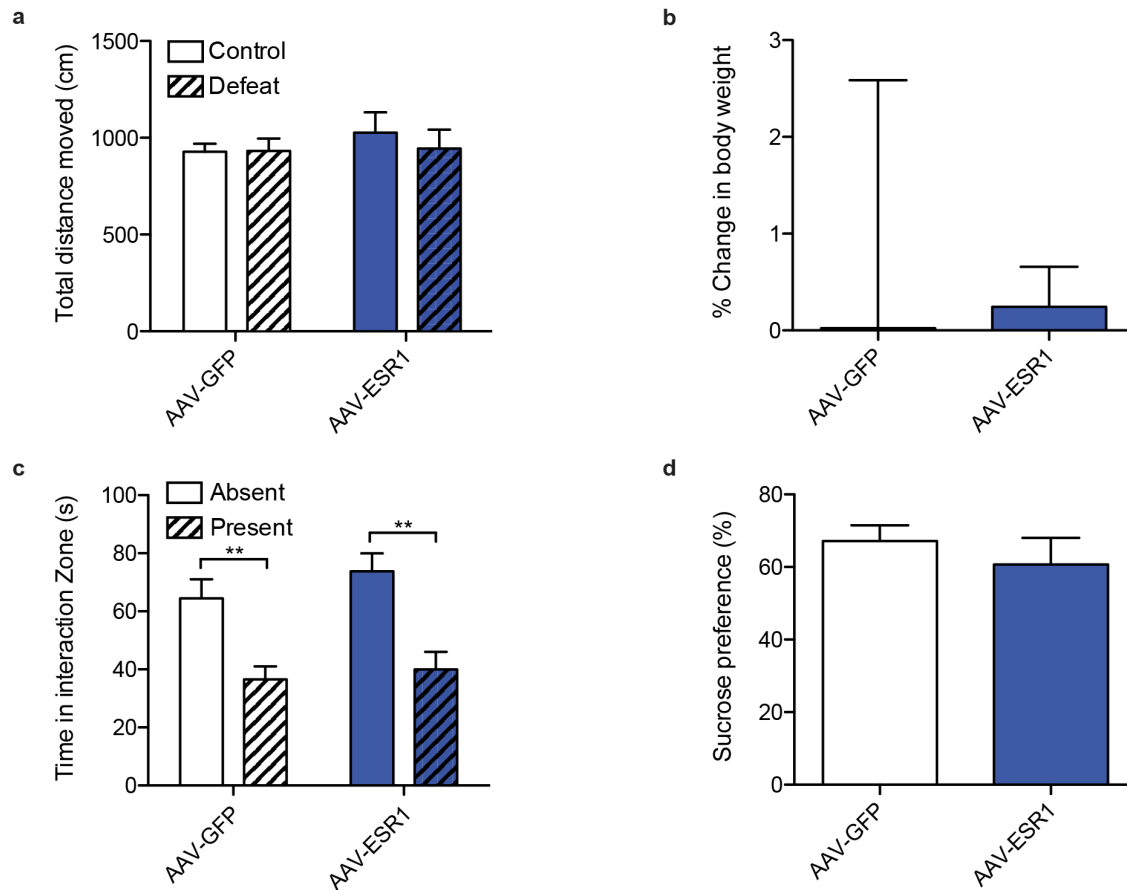

**Supplementary Figure 5: Effects of ER $\alpha$  overexpression in NAc and PFC in male mice. (a)**

There is no effect of virus ( $F_{(1,31)} = 0.499, P < 0.485; n = 10,9,8,9$ ) or defeat ( $F_{(1,31)} = 0.238, P < 0.629$ ) on locomotion and **(b)** no effect of virus on change in body weight 3.5 weeks after viral infusion ( $U = 9, P < 0.548, n = 5$ ). In mice undergoing CSDS following viral infusion in PFC **(c)** whether a CD1 aggressor mouse is present ( $F_{(1,18)} = 27.88, P < 0.001, n = 10$ ), but not virus ( $F_{(1,18)} = 1.15, P < 0.280$ ), has a significant effect on time spent in the interaction zone in the social interaction test and **(d)** ER $\alpha$  overexpression has no effect on sucrose preference ( $t_{(19)} = 0.774, P < 0.445; n = 11,10$ ). **a**, Two-way ANOVA. **b**, independent samples Mann-Whitney. **c**, Mixed-Models ANOVA. **d**, two tailed t-test. \* $P < 0.01$  post-hoc independent samples Mann-Whitney.



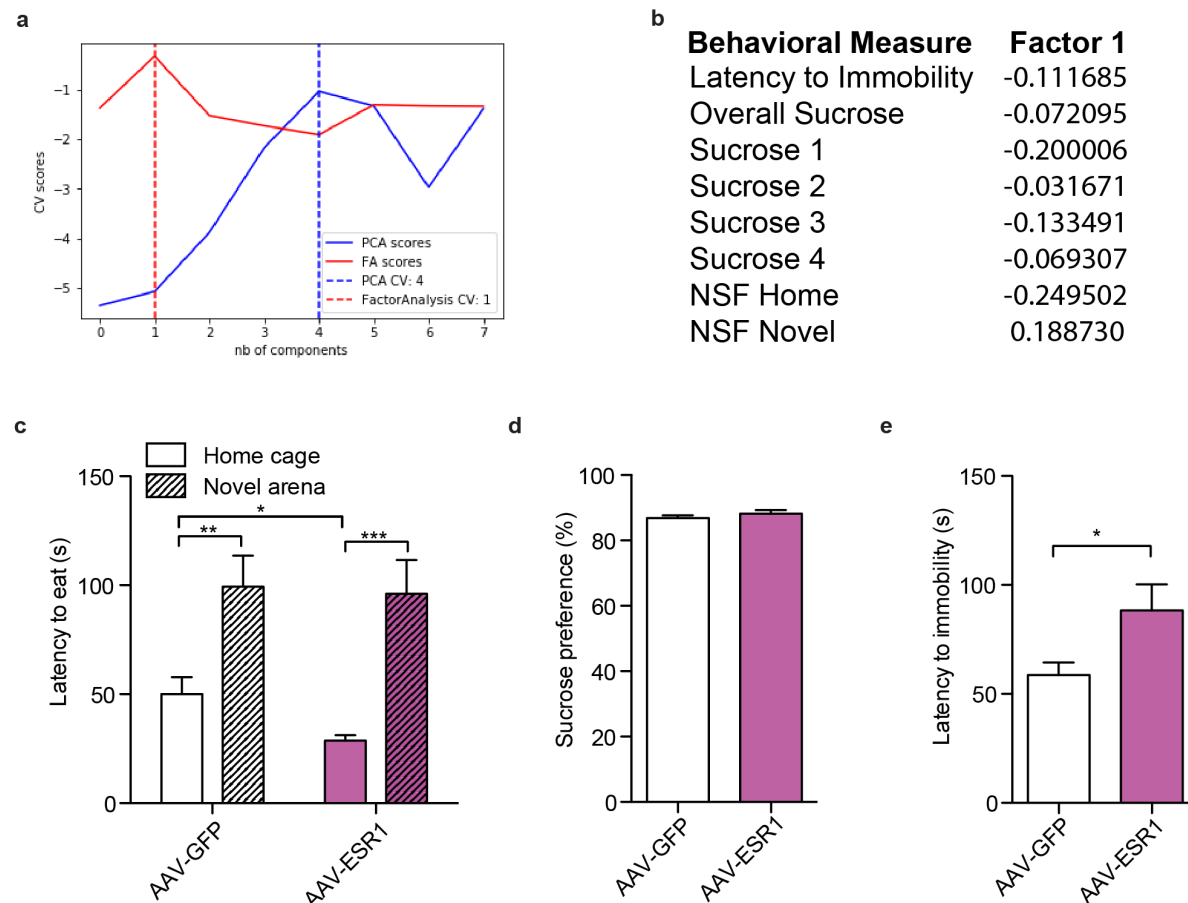

**Supplementary Figure 6: Female factor analysis and behavioral differences in unstressed controls.** (a) Comparison of communalities (observed variance) for different numbers of components in exploratory factor analysis and principal components analysis reveals maximum likelihood for a single factor in exploratory factor analysis. (b) Variable loading for factor 1. (c) In unstressed female mice there is a significant difference between groups in latency to eat in the novelty suppressed feeding test ( $\chi^2(3) = 22.31, P < 0.001, n = 11,12$ ). Both AAV-GFP ( $P < 0.009$ ) and AAV-ESR1 ( $P < 0.001$ ) injected mice take longer to feed in the novel arena but virus only affected latency to eat in the home cage ( $P < 0.016$ ). While there is no significant difference for unstressed females in (d) sucrose preference ( $t_{(21)} = 0.932, P < 0.362; n = 11,12$ ), (e) AAV-ESR1 injected mice show a higher latency to immobility in the forced swim test ( $U = 26.5 P < 0.027, n = 11,12$ ). **c**, Kruskal-Wallis test. **d**, two tailed t-test. **e**, independent samples Mann-Whitney.  $P < 0.05$ ,  $^*P < 0.01$ ,  $^{***}P < 0.001$  in **c** post-hoc independent samples Mann-Whitney.

a

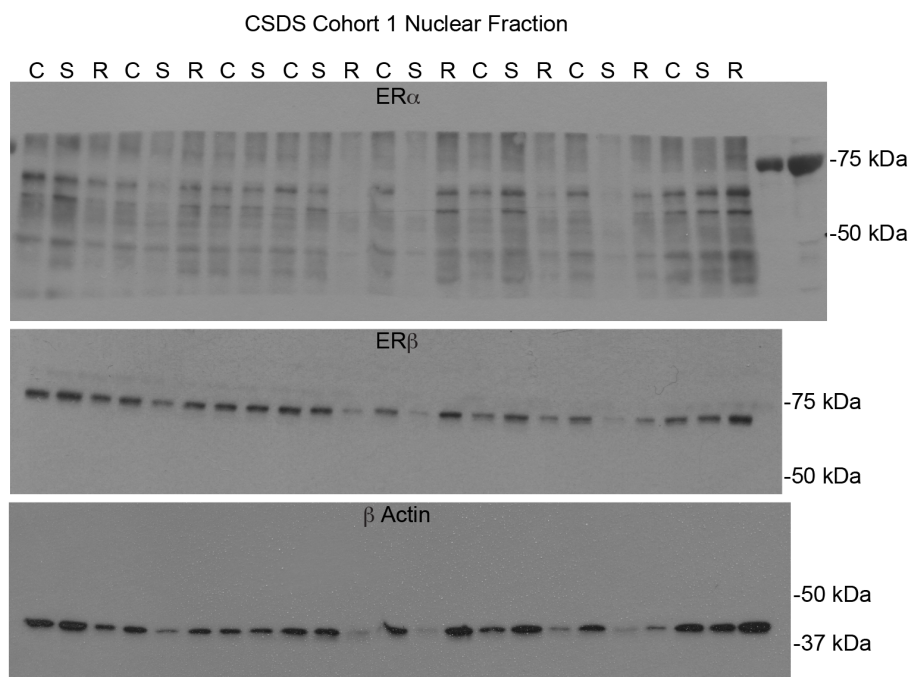

b

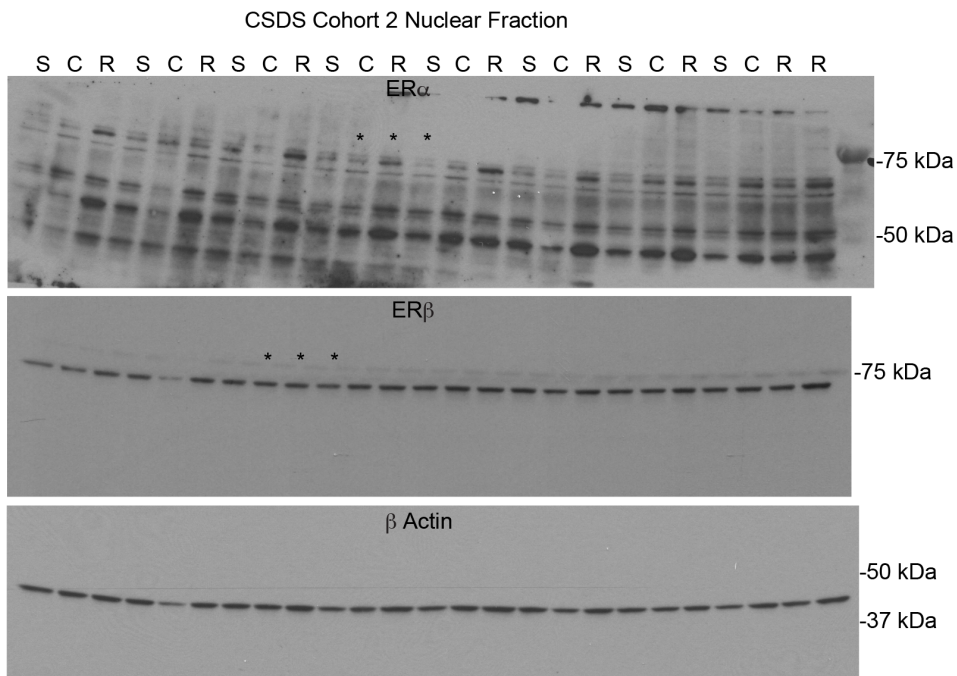

**Supplementary Figure 7: Full western blots for male CSDS nuclear fraction.** Stars identify lanes that were cropped to be featured in main figures.

a

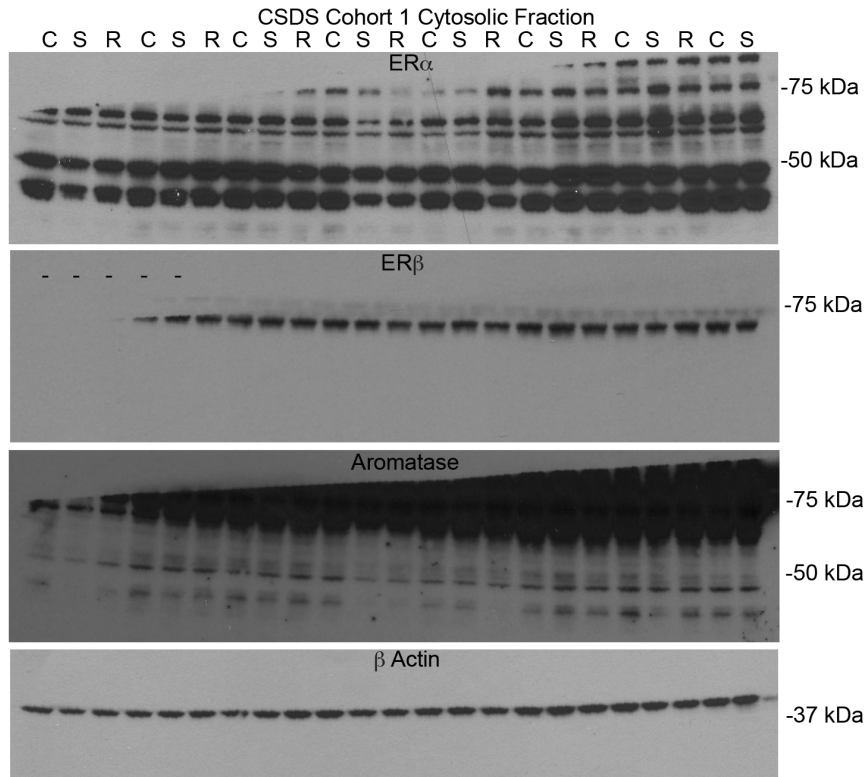

b

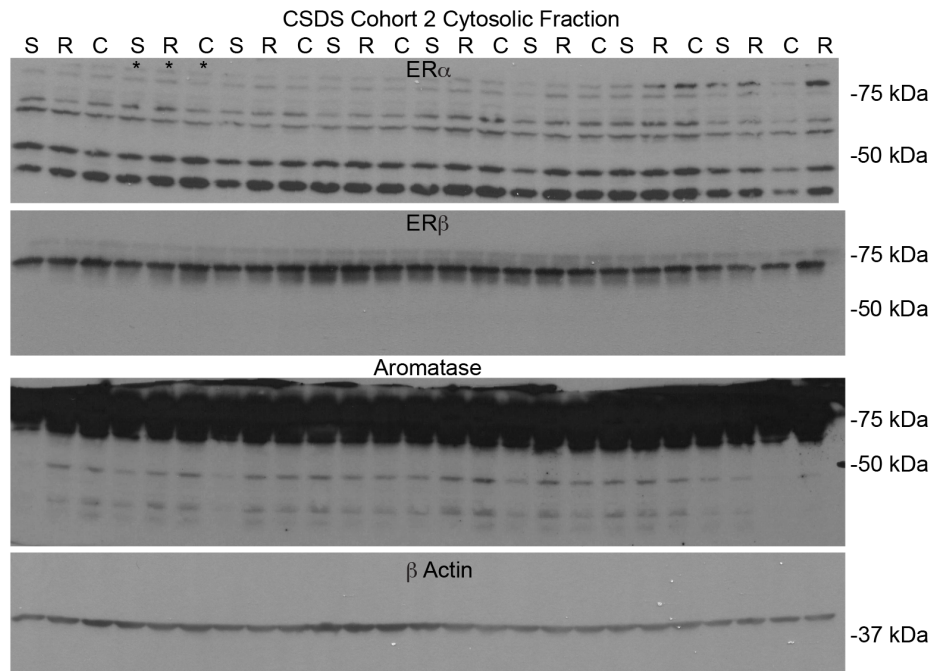

**Supplementary Figure 8: Full western blots for male CSDS cytosolic fraction.** Stars identify lanes that were cropped to be featured in main figures. Minus signs indicate that lanes were not utilized in analysis.

a

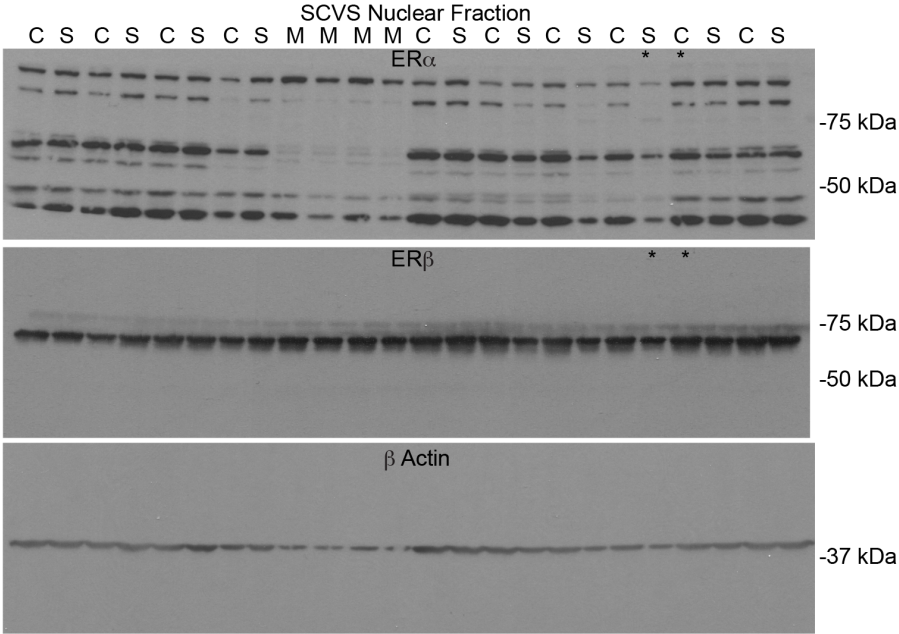

b

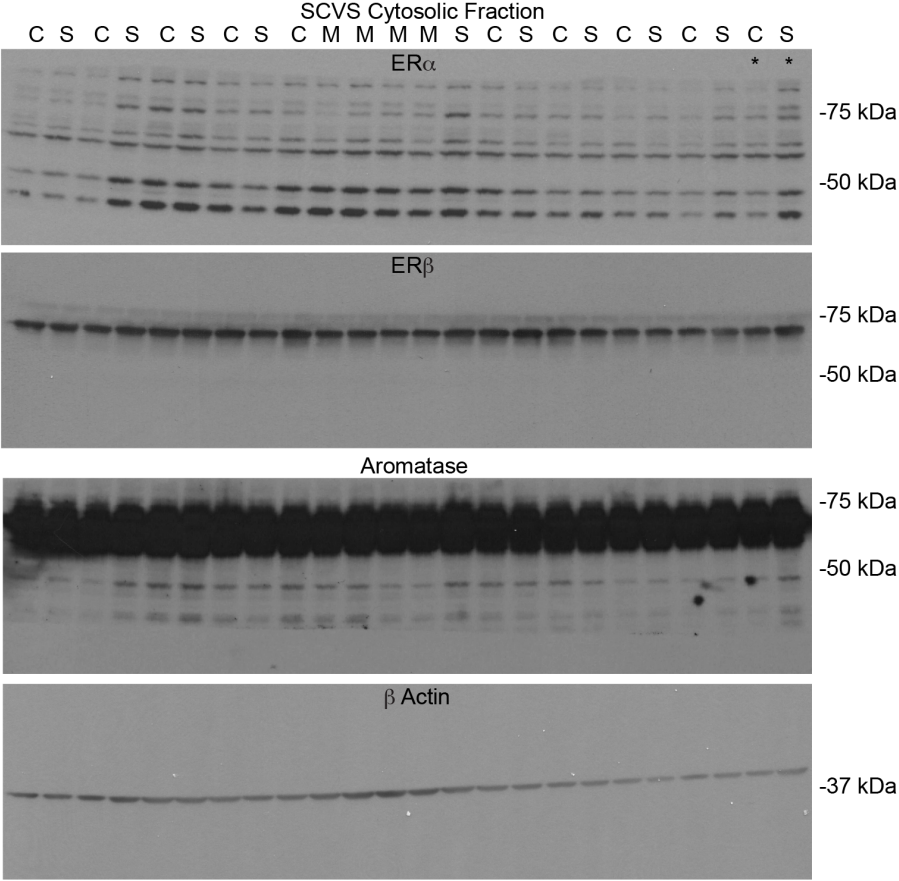

**Supplementary Figure 9: Full western blots for female CVS.** Stars identify lanes that were cropped to be featured in main figures.
